# Supplementary material
Source: publisher figshare collection journal article supplement (https://acs.figshare.com/ndownloader/files/5136427)
Supplement: Supplementary file 1 [file 5136427]

 
data_2
 
_audit_creation_method            SHELXL-97 
_chemical_name_systematic 
; 
 ? 
; 
_chemical_name_common             ? 
_chemical_melting_point           ? 
_chemical_formula_moiety          ? 
_chemical_formula_sum 
 'C60 H48 Cd N10 O18' 
_chemical_formula_weight          1309.48 
 
loop_ 
 _atom_type_symbol 
 _atom_type_description 
 _atom_type_scat_dispersion_real 
 _atom_type_scat_dispersion_imag 
 _atom_type_scat_source 
 'C'  'C'   0.0033   0.0016 
 'International Tables Vol C Tables 4.2.6.8 and 6.1.1.4' 
 'H'  'H'   0.0000   0.0000 
 'International Tables Vol C Tables 4.2.6.8 and 6.1.1.4' 
 'N'  'N'   0.0061   0.0033 
 'International Tables Vol C Tables 4.2.6.8 and 6.1.1.4' 
 'O'  'O'   0.0106   0.0060 
 'International Tables Vol C Tables 4.2.6.8 and 6.1.1.4' 
 'Cd'  'Cd'  -0.8075   1.2024 
 'International Tables Vol C Tables 4.2.6.8 and 6.1.1.4' 
 
_symmetry_cell_setting            Triclinic 
_symmetry_space_group_name_H-M    p-1 
 
loop_ 
 _symmetry_equiv_pos_as_xyz 
 'x, y, z' 
 '-x, -y, -z' 
 
_cell_length_a                    9.491(4) 
_cell_length_b                    10.759(4) 
_cell_length_c                    15.026(6) 
_cell_angle_alpha                 74.520(6) 
_cell_angle_beta                  83.059(6) 
_cell_angle_gamma                 84.896(6) 
_cell_volume                      1465.2(10) 
_cell_formula_units_Z             1 
_cell_measurement_temperature     293(2) 
_cell_measurement_reflns_used     ? 
_cell_measurement_theta_min       ? 
_cell_measurement_theta_max       ? 
 
_exptl_crystal_description        block 
_exptl_crystal_colour             colorless 
_exptl_crystal_size_max           0.49 
_exptl_crystal_size_mid           0.29 
_exptl_crystal_size_min           0.13 
_exptl_crystal_density_meas       ? 
_exptl_crystal_density_diffrn     1.484 
_exptl_crystal_density_method     'not measured' 
_exptl_crystal_F_000              670 
_exptl_absorpt_coefficient_mu     0.456 
_exptl_absorpt_correction_type    none 
_exptl_absorpt_correction_T_min   ? 
_exptl_absorpt_correction_T_max   ? 
_exptl_absorpt_process_details    ? 
 
_exptl_special_details 
; 
 ? 
; 
 
_diffrn_ambient_temperature       293(2) 
_diffrn_radiation_wavelength      0.71073 
_diffrn_radiation_type            MoK\a 
_diffrn_radiation_source          'fine-focus sealed tube' 
_diffrn_radiation_monochromator   graphite 
_diffrn_measurement_device_type   ? 
_diffrn_measurement_method        ? 
_diffrn_detector_area_resol_mean  ? 
_diffrn_standards_number          ? 
_diffrn_standards_interval_count  ? 
_diffrn_standards_interval_time   ? 
_diffrn_standards_decay_%         ? 
_diffrn_reflns_number             12392 
_diffrn_reflns_av_R_equivalents   0.0174 
_diffrn_reflns_av_sigmaI/netI     0.0278 
_diffrn_reflns_limit_h_min        -12 
_diffrn_reflns_limit_h_max        11 
_diffrn_reflns_limit_k_min        -13 
_diffrn_reflns_limit_k_max        13 
_diffrn_reflns_limit_l_min        -19 
_diffrn_reflns_limit_l_max        19 
_diffrn_reflns_theta_min          1.97 
_diffrn_reflns_theta_max          27.07 
_reflns_number_total              6273 
_reflns_number_gt                 5037 
_reflns_threshold_expression      >2sigma(I) 
 
_computing_data_collection        ? 
_computing_cell_refinement        ? 
_computing_data_reduction         ? 
_computing_structure_solution     'SHELXS-97 (Sheldrick, 1990)' 
_computing_structure_refinement   'SHELXL-97 (Sheldrick, 1997)' 
_computing_molecular_graphics     ? 
_computing_publication_material   ? 
 
_refine_special_details 
; 
 Refinement of F^2^ against ALL reflections.  The weighted R-factor wR and 
 goodness of fit S are based on F^2^, conventional R-factors R are based 
 on F, with F set to zero for negative F^2^. The threshold expression of 
 F^2^ > 2sigma(F^2^) is used only for calculating R-factors(gt) etc. and is 
 not relevant to the choice of reflections for refinement.  R-factors based 
 on F^2^ are statistically about twice as large as those based on F, and R- 
 factors based on ALL data will be even larger. 
; 
 
_refine_ls_structure_factor_coef  Fsqd  
_refine_ls_matrix_type            full 
_refine_ls_weighting_scheme       calc  
_refine_ls_weighting_details 
 'calc w=1/[\s^2^(Fo^2^)+(0.0904P)^2^+0.5581P] where P=(Fo^2^+2Fc^2^)/3' 
_atom_sites_solution_primary      direct 
_atom_sites_solution_secondary    difmap 
_atom_sites_solution_hydrogens    geom 
_refine_ls_hydrogen_treatment     mixed 
_refine_ls_extinction_method      none 
_refine_ls_extinction_coef        ? 
_refine_ls_number_reflns          6273 
_refine_ls_number_parameters      421 
_refine_ls_number_restraints      0 
_refine_ls_R_factor_all           0.0658 
_refine_ls_R_factor_gt            0.0507 
_refine_ls_wR_factor_ref          0.1515 
_refine_ls_wR_factor_gt           0.1378 
_refine_ls_goodness_of_fit_ref    1.061 
_refine_ls_restrained_S_all       1.061 
_refine_ls_shift/su_max           3.200 
_refine_ls_shift/su_mean          0.136 
 
loop_ 
 _atom_site_label 
 _atom_site_type_symbol 
 _atom_site_fract_x 
 _atom_site_fract_y 
 _atom_site_fract_z 
 _atom_site_U_iso_or_equiv 
 _atom_site_adp_type 
 _atom_site_occupancy 
 _atom_site_symmetry_multiplicity 
 _atom_site_calc_flag 
 _atom_site_refinement_flags 
 _atom_site_disorder_assembly 
 _atom_site_disorder_group 
Cd1 Cd 0.0000 0.0000 0.0000 0.05594(15) Uani 1 2 d S . . 
O5 O 0.4864(3) -0.0393(3) 0.23457(16) 0.0681(6) Uani 1 1 d . . . 
N4 N 0.3364(3) 0.0341(3) 0.34446(17) 0.0538(6) Uani 1 1 d . . . 
O4 O 0.2196(3) 0.0562(3) 0.48373(18) 0.0801(8) Uani 1 1 d . . . 
O1 O 0.2060(3) -0.2291(3) 0.3538(2) 0.0788(8) Uani 1 1 d . . . 
C16 C 0.1248(4) 0.0921(3) 0.2596(2) 0.0546(7) Uani 1 1 d . . . 
N3 N -0.0002(3) 0.0373(4) 0.14728(19) 0.0674(8) Uani 1 1 d . . . 
N2 N 0.2371(4) -0.3872(3) 0.2754(3) 0.0756(9) Uani 1 1 d . . . 
N1 N 0.2256(3) -0.1071(3) 0.0251(2) 0.0639(7) Uani 1 1 d . . . 
C1 C 0.2385(4) -0.1930(4) 0.1061(3) 0.0632(9) Uani 1 1 d . . . 
H1A H 0.1580 -0.2073 0.1486 0.076 Uiso 1 1 calc R . . 
C21 C 0.4421(3) -0.0470(3) 0.3141(2) 0.0532(7) Uani 1 1 d . . . 
C15 C 0.1125(4) 0.0820(3) 0.1715(2) 0.0573(8) Uani 1 1 d . . . 
H15A H 0.1872 0.1079 0.1260 0.069 Uiso 1 1 calc R . . 
C20 C 0.2582(4) 0.1375(3) 0.2831(2) 0.0616(8) Uani 1 1 d . . . 
H20A H 0.3187 0.1709 0.2264 0.074 Uiso 1 1 calc R . . 
H20B H 0.2330 0.2074 0.3128 0.074 Uiso 1 1 calc R . . 
C22 C 0.4877(4) -0.1416(3) 0.3999(2) 0.0594(9) Uani 1 1 d . . . 
C2 C 0.3624(4) -0.2621(4) 0.1312(3) 0.0686(10) Uani 1 1 d . . . 
C28 C 0.3079(4) 0.0001(4) 0.4411(2) 0.0621(9) Uani 1 1 d . . . 
C8 C 0.0275(4) -0.3842(3) 0.3699(3) 0.0667(10) Uani 1 1 d . . . 
C7 C 0.1640(4) -0.3199(3) 0.3352(3) 0.0644(9) Uani 1 1 d . . . 
C27 C 0.4055(4) -0.1124(4) 0.4750(2) 0.0632(9) Uani 1 1 d . . . 
C26 C 0.4231(5) -0.1867(5) 0.5651(2) 0.0793(13) Uani 1 1 d . . . 
H26A H 0.3689 -0.1680 0.6163 0.095 Uiso 1 1 calc R . . 
C9 C -0.0810(4) -0.3562(4) 0.4303(3) 0.0766(12) Uani 1 1 d . . . 
H9A H -0.0803 -0.2868 0.4561 0.092 Uiso 1 1 calc R . . 
O2 O 0.2014(6) -0.5610(3) 0.2210(3) 0.1356(16) Uani 1 1 d . . . 
N5 N -0.1453(5) -0.2641(5) 0.1135(4) 0.0990(14) Uani 1 1 d . . . 
C17 C 0.0107(4) 0.0532(5) 0.3263(3) 0.0743(11) Uani 1 1 d . . . 
H17A H 0.0135 0.0590 0.3867 0.089 Uiso 1 1 calc R . . 
C6 C 0.3737(5) -0.3543(5) 0.2247(3) 0.0852(13) Uani 1 1 d . . . 
H6A H 0.4265 -0.4328 0.2169 0.102 Uiso 1 1 calc R . . 
H6B H 0.4269 -0.3161 0.2609 0.102 Uiso 1 1 calc R . . 
C18 C -0.1054(4) 0.0066(6) 0.3028(3) 0.0929(16) Uani 1 1 d . . . 
H18A H -0.1821 -0.0190 0.3469 0.111 Uiso 1 1 calc R . . 
C13 C 0.0270(6) -0.4857(4) 0.3298(4) 0.0882(15) Uani 1 1 d . . . 
O6 O -0.1603(8) -0.1651(7) 0.0618(5) 0.0714(17) Uani 0.50 1 d P . . 
C19 C -0.1069(4) -0.0017(6) 0.2134(3) 0.0923(15) Uani 1 1 d . . . 
H19A H -0.1847 -0.0356 0.1981 0.111 Uiso 1 1 calc R . . 
C12 C -0.0845(8) -0.5657(5) 0.3516(5) 0.111(2) Uani 1 1 d . . . 
H12A H -0.0849 -0.6347 0.3253 0.133 Uiso 1 1 calc R . . 
O7 O -0.2245(6) -0.3316(6) 0.1704(4) 0.097(2) Uani 0.50 1 d P . . 
C3 C 0.4778(5) -0.2415(7) 0.0684(4) 0.120(2) Uani 1 1 d . . . 
H3A H 0.5632 -0.2885 0.0815 0.144 Uiso 1 1 calc R . . 
C14 C 0.1620(6) -0.4883(4) 0.2674(4) 0.0922(15) Uani 1 1 d . . . 
C5 C 0.3408(5) -0.0840(7) -0.0340(3) 0.1071(19) Uani 1 1 d . . . 
H5A H 0.3352 -0.0210 -0.0897 0.128 Uiso 1 1 calc R . . 
C4 C 0.4686(6) -0.1507(9) -0.0152(4) 0.156(4) Uani 1 1 d . . . 
H4A H 0.5480 -0.1347 -0.0585 0.188 Uiso 1 1 calc R . . 
O3 O -0.3031(4) -0.4225(4) 0.5183(3) 0.1129(14) Uani 1 1 d . . . 
C23 C 0.5882(4) -0.2427(4) 0.4083(3) 0.0681(10) Uani 1 1 d . . . 
H23A H 0.6420 -0.2620 0.3572 0.082 Uiso 1 1 calc R . . 
C24 C 0.6038(4) -0.3149(4) 0.4998(3) 0.0821(14) Uani 1 1 d . . . 
C25 C 0.5232(5) -0.2880(5) 0.5751(3) 0.0871(15) Uani 1 1 d . . . 
H25A H 0.5367 -0.3396 0.6343 0.105 Uiso 1 1 calc R . . 
C10 C -0.1935(5) -0.4373(4) 0.4513(4) 0.0896(16) Uani 1 1 d . . . 
C11 C -0.1945(7) -0.5404(5) 0.4130(5) 0.115(2) Uani 1 1 d . . . 
H11A H -0.2708 -0.5933 0.4292 0.139 Uiso 1 1 calc R . . 
O8 O -0.0458(18) -0.3310(12) 0.1133(11) 0.392(8) Uani 1 1 d . . . 
O9 O 0.340(2) -0.3316(14) 0.8084(8) 0.259(6) Uani 1 1 d . . . 
C29 C 0.192(2) -0.418(2) 0.9497(13) 0.43(2) Uani 1 1 d . . . 
H29A H 0.0917 -0.4092 0.9448 0.650 Uiso 1 1 calc R . . 
H29B H 0.2139 -0.3727 0.9929 0.650 Uiso 1 1 calc R . . 
H29C H 0.2212 -0.5080 0.9713 0.650 Uiso 1 1 calc R . . 
C30 C 0.259(5) -0.370(2) 0.8692(17) 0.43(3) Uani 1 1 d . . . 
O6' O -0.1078(15) -0.1735(15) 0.1231(19) 0.236(9) Uani 0.50 1 d P . . 
O7' O -0.158(2) -0.241(2) 0.0268(10) 0.239(9) Uani 0.50 1 d P . . 
 
loop_ 
 _atom_site_aniso_label 
 _atom_site_aniso_U_11 
 _atom_site_aniso_U_22 
 _atom_site_aniso_U_33 
 _atom_site_aniso_U_23 
 _atom_site_aniso_U_13 
 _atom_site_aniso_U_12 
Cd1 0.0483(2) 0.0724(3) 0.0446(2) -0.00874(15) -0.01539(13) 0.00414(15) 
O5 0.0765(16) 0.0745(16) 0.0445(13) -0.0013(11) -0.0095(11) 0.0032(13) 
N4 0.0650(16) 0.0568(15) 0.0411(13) -0.0073(11) -0.0160(12) -0.0137(13) 
O4 0.094(2) 0.101(2) 0.0512(14) -0.0270(14) -0.0055(14) -0.0185(17) 
O1 0.0726(17) 0.0708(17) 0.095(2) -0.0127(15) -0.0212(15) -0.0241(14) 
C16 0.0599(19) 0.0569(18) 0.0436(16) -0.0105(13) -0.0103(14) 0.0145(14) 
N3 0.0466(15) 0.107(2) 0.0451(14) -0.0148(15) -0.0076(12) 0.0022(15) 
N2 0.088(2) 0.0485(17) 0.085(2) 0.0029(15) -0.0386(19) 0.0041(15) 
N1 0.0546(16) 0.083(2) 0.0517(15) -0.0135(14) -0.0155(13) 0.0103(14) 
C1 0.0574(19) 0.067(2) 0.061(2) -0.0112(16) -0.0132(16) 0.0122(16) 
C21 0.0554(17) 0.0568(18) 0.0460(17) -0.0010(13) -0.0184(14) -0.0150(14) 
C15 0.0551(18) 0.069(2) 0.0425(15) -0.0081(14) -0.0065(13) 0.0057(15) 
C20 0.086(2) 0.0491(18) 0.0501(17) -0.0093(14) -0.0151(16) -0.0034(16) 
C22 0.0593(19) 0.066(2) 0.0499(17) 0.0056(14) -0.0240(15) -0.0246(16) 
C2 0.061(2) 0.075(2) 0.072(2) -0.0211(18) -0.0253(18) 0.0191(17) 
C28 0.071(2) 0.077(2) 0.0435(16) -0.0132(16) -0.0129(16) -0.0295(19) 
C8 0.067(2) 0.0481(18) 0.080(2) 0.0094(16) -0.040(2) -0.0101(16) 
C7 0.066(2) 0.0497(19) 0.072(2) 0.0047(16) -0.0327(18) -0.0041(16) 
C27 0.071(2) 0.073(2) 0.0457(17) 0.0006(15) -0.0219(16) -0.0327(18) 
C26 0.091(3) 0.099(3) 0.0461(18) 0.0073(18) -0.0252(18) -0.050(3) 
C9 0.069(2) 0.056(2) 0.091(3) 0.0208(19) -0.041(2) -0.0122(18) 
O2 0.198(5) 0.064(2) 0.151(4) -0.034(2) -0.047(3) 0.019(3) 
N5 0.083(3) 0.073(3) 0.140(4) -0.017(3) -0.045(3) 0.012(2) 
C17 0.066(2) 0.111(3) 0.0451(18) -0.0245(19) -0.0069(16) 0.013(2) 
C6 0.075(3) 0.080(3) 0.091(3) -0.005(2) -0.031(2) 0.025(2) 
C18 0.049(2) 0.173(5) 0.049(2) -0.020(2) -0.0002(16) 0.001(2) 
C13 0.108(4) 0.046(2) 0.112(4) 0.005(2) -0.065(3) -0.011(2) 
O6 0.083(4) 0.064(4) 0.063(4) 0.008(3) -0.026(3) -0.027(3) 
C19 0.047(2) 0.171(5) 0.055(2) -0.020(3) -0.0096(16) -0.008(2) 
C12 0.135(5) 0.064(3) 0.136(5) 0.003(3) -0.069(4) -0.033(3) 
O7 0.059(3) 0.091(4) 0.096(4) 0.065(3) -0.015(3) -0.033(3) 
C3 0.064(3) 0.182(6) 0.095(4) -0.015(4) -0.018(3) 0.048(3) 
C14 0.120(4) 0.052(2) 0.102(4) -0.005(2) -0.047(3) 0.013(2) 
C5 0.058(2) 0.180(5) 0.060(2) 0.000(3) -0.0074(19) 0.019(3) 
C4 0.068(3) 0.275(10) 0.082(4) 0.010(5) -0.002(3) 0.050(4) 
O3 0.0705(19) 0.106(2) 0.121(3) 0.057(2) -0.0344(19) -0.0167(17) 
C23 0.0534(19) 0.071(2) 0.069(2) 0.0126(17) -0.0254(16) -0.0181(17) 
C24 0.058(2) 0.084(3) 0.087(3) 0.030(2) -0.036(2) -0.032(2) 
C25 0.078(3) 0.101(3) 0.066(2) 0.035(2) -0.039(2) -0.046(2) 
C10 0.064(2) 0.077(3) 0.105(3) 0.037(2) -0.043(2) -0.019(2) 
C11 0.100(4) 0.079(3) 0.157(6) 0.026(3) -0.074(4) -0.045(3) 
O8 0.53(2) 0.243(12) 0.420(19) -0.085(12) -0.220(16) 0.140(14) 
O9 0.390(15) 0.210(9) 0.185(11) -0.052(8) -0.066(11) -0.021(9) 
C29 0.60(4) 0.46(3) 0.34(2) -0.30(3) 0.31(3) -0.38(3) 
C30 0.96(10) 0.166(17) 0.23(3) -0.117(19) -0.26(4) 0.08(3) 
O6' 0.138(10) 0.150(11) 0.46(3) -0.128(16) -0.037(14) -0.051(9) 
O7' 0.29(2) 0.27(2) 0.101(10) 0.035(11) -0.012(11) 0.042(17) 
 
_geom_special_details 
; 
 All esds (except the esd in the dihedral angle between two l.s. planes) 
 are estimated using the full covariance matrix.  The cell esds are taken 
 into account individually in the estimation of esds in distances, angles 
 and torsion angles; correlations between esds in cell parameters are only 
 used when they are defined by crystal symmetry.  An approximate (isotropic) 
 treatment of cell esds is used for estimating esds involving l.s. planes. 
; 
 
loop_ 
 _geom_bond_atom_site_label_1 
 _geom_bond_atom_site_label_2 
 _geom_bond_distance 
 _geom_bond_site_symmetry_2 
 _geom_bond_publ_flag 
Cd1 O6' 2.45(2) 2 ? 
Cd1 O6' 2.45(2) . ? 
Cd1 N3 2.352(3) . ? 
Cd1 N3 2.352(3) 2 ? 
Cd1 N1 2.362(3) . ? 
Cd1 N1 2.362(3) 2 ? 
Cd1 O6 2.365(6) 2 ? 
Cd1 O6 2.365(6) . ? 
O5 C21 1.202(4) . ? 
N4 C21 1.385(5) . ? 
N4 C28 1.398(4) . ? 
N4 C20 1.452(4) . ? 
O4 C28 1.210(5) . ? 
O1 C7 1.197(4) . ? 
C16 C15 1.376(5) . ? 
C16 C17 1.395(5) . ? 
C16 C20 1.510(5) . ? 
N3 C15 1.337(5) . ? 
N3 C19 1.342(5) . ? 
N2 C14 1.392(6) . ? 
N2 C7 1.385(6) . ? 
N2 C6 1.444(6) . ? 
N1 C5 1.319(5) . ? 
N1 C1 1.330(4) . ? 
C1 C2 1.371(5) . ? 
C21 C22 1.497(4) . ? 
C22 C27 1.382(6) . ? 
C22 C23 1.372(6) . ? 
C2 C3 1.350(7) . ? 
C2 C6 1.497(6) . ? 
C28 C27 1.472(6) . ? 
C8 C9 1.356(6) . ? 
C8 C13 1.381(6) . ? 
C8 C7 1.494(5) . ? 
C27 C26 1.398(5) . ? 
C26 C25 1.370(7) . ? 
C9 C10 1.393(6) . ? 
O2 C14 1.189(7) . ? 
N5 O6 1.147(8) . ? 
N5 O6' 1.116(12) . ? 
N5 O7 1.197(7) . ? 
N5 O8 1.136(13) . ? 
N5 O7' 1.279(16) . ? 
C17 C18 1.370(6) . ? 
C18 C19 1.372(6) . ? 
C13 C12 1.377(7) . ? 
C13 C14 1.496(8) . ? 
O6 O6' 1.08(2) . ? 
O6 O7' 1.08(2) . ? 
C12 C11 1.366(9) . ? 
C3 C4 1.377(8) . ? 
C5 C4 1.373(7) . ? 
O3 C24 1.380(6) 1_455 ? 
O3 C10 1.386(7) . ? 
C23 C24 1.405(5) . ? 
C24 O3 1.380(6) 1_655 ? 
C24 C25 1.370(7) . ? 
C10 C11 1.381(9) . ? 
O9 C30 1.13(5) . ? 
C29 C30 1.29(3) . ? 
O6' O7' 1.91(3) . ? 
 
loop_ 
 _geom_angle_atom_site_label_1 
 _geom_angle_atom_site_label_2 
 _geom_angle_atom_site_label_3 
 _geom_angle 
 _geom_angle_site_symmetry_1 
 _geom_angle_site_symmetry_3 
 _geom_angle_publ_flag 
O6' Cd1 O6' 180.0(16) 2 . ? 
O6' Cd1 N3 111.7(5) 2 . ? 
O6' Cd1 N3 68.3(5) . . ? 
O6' Cd1 N3 68.3(5) 2 2 ? 
O6' Cd1 N3 111.7(5) . 2 ? 
N3 Cd1 N3 180.0(2) . 2 ? 
O6' Cd1 N1 90.8(4) 2 . ? 
O6' Cd1 N1 89.2(4) . . ? 
N3 Cd1 N1 86.12(10) . . ? 
N3 Cd1 N1 93.88(10) 2 . ? 
O6' Cd1 N1 89.2(4) 2 2 ? 
O6' Cd1 N1 90.8(4) . 2 ? 
N3 Cd1 N1 93.88(10) . 2 ? 
N3 Cd1 N1 86.12(10) 2 2 ? 
N1 Cd1 N1 180.0(2) . 2 ? 
O6' Cd1 O6 25.8(5) 2 2 ? 
O6' Cd1 O6 154.2(5) . 2 ? 
N3 Cd1 O6 89.3(2) . 2 ? 
N3 Cd1 O6 90.7(2) 2 2 ? 
N1 Cd1 O6 76.1(2) . 2 ? 
N1 Cd1 O6 103.9(2) 2 2 ? 
O6' Cd1 O6 154.2(5) 2 . ? 
O6' Cd1 O6 25.8(5) . . ? 
N3 Cd1 O6 90.7(2) . . ? 
N3 Cd1 O6 89.3(2) 2 . ? 
N1 Cd1 O6 103.9(2) . . ? 
N1 Cd1 O6 76.1(2) 2 . ? 
O6 Cd1 O6 180.0(4) 2 . ? 
C21 N4 C28 112.1(3) . . ? 
C21 N4 C20 124.1(3) . . ? 
C28 N4 C20 123.7(3) . . ? 
C15 C16 C17 116.7(3) . . ? 
C15 C16 C20 121.2(3) . . ? 
C17 C16 C20 122.0(3) . . ? 
C15 N3 C19 117.8(3) . . ? 
C15 N3 Cd1 121.5(2) . . ? 
C19 N3 Cd1 120.1(3) . . ? 
C14 N2 C7 112.3(4) . . ? 
C14 N2 C6 123.5(4) . . ? 
C7 N2 C6 124.2(4) . . ? 
C5 N1 C1 117.8(3) . . ? 
C5 N1 Cd1 124.7(3) . . ? 
C1 N1 Cd1 117.5(2) . . ? 
N1 C1 C2 124.4(4) . . ? 
O5 C21 N4 125.6(3) . . ? 
O5 C21 C22 128.6(3) . . ? 
N4 C21 C22 105.8(3) . . ? 
N3 C15 C16 124.1(3) . . ? 
N4 C20 C16 111.9(3) . . ? 
C27 C22 C23 123.3(3) . . ? 
C27 C22 C21 107.4(3) . . ? 
C23 C22 C21 129.3(4) . . ? 
C3 C2 C1 117.1(4) . . ? 
C3 C2 C6 120.2(4) . . ? 
C1 C2 C6 122.7(4) . . ? 
O4 C28 N4 124.3(4) . . ? 
O4 C28 C27 130.0(3) . . ? 
N4 C28 C27 105.7(3) . . ? 
C9 C8 C13 122.6(4) . . ? 
C9 C8 C7 129.7(4) . . ? 
C13 C8 C7 107.7(4) . . ? 
O1 C7 N2 125.2(4) . . ? 
O1 C7 C8 128.7(4) . . ? 
N2 C7 C8 106.2(3) . . ? 
C22 C27 C26 120.3(4) . . ? 
C22 C27 C28 109.0(3) . . ? 
C26 C27 C28 130.8(4) . . ? 
C25 C26 C27 117.4(4) . . ? 
C8 C9 C10 116.2(5) . . ? 
O6 N5 O6' 56.9(12) . . ? 
O6 N5 O7 133.4(6) . . ? 
O6' N5 O7 122.8(14) . . ? 
O6 N5 O8 124.6(11) . . ? 
O6' N5 O8 104.6(12) . . ? 
O7 N5 O8 101.4(10) . . ? 
O6 N5 O7' 52.6(10) . . ? 
O6' N5 O7' 105.5(16) . . ? 
O7 N5 O7' 121.3(12) . . ? 
O8 N5 O7' 96.2(13) . . ? 
C18 C17 C16 120.0(3) . . ? 
N2 C6 C2 113.1(3) . . ? 
C17 C18 C19 119.0(4) . . ? 
C8 C13 C12 120.7(6) . . ? 
C8 C13 C14 108.4(4) . . ? 
C12 C13 C14 130.9(5) . . ? 
O6' O6 O7' 124.1(15) . . ? 
O6' O6 N5 60.1(9) . . ? 
O7' O6 N5 70.0(9) . . ? 
O6' O6 Cd1 81.4(10) . . ? 
O7' O6 Cd1 117.6(12) . . ? 
N5 O6 Cd1 130.4(5) . . ? 
N3 C19 C18 122.4(4) . . ? 
C11 C12 C13 117.9(6) . . ? 
C2 C3 C4 119.8(4) . . ? 
O2 C14 N2 125.6(6) . . ? 
O2 C14 C13 128.9(5) . . ? 
N2 C14 C13 105.5(4) . . ? 
N1 C5 C4 121.6(5) . . ? 
C3 C4 C5 119.2(5) . . ? 
C24 O3 C10 119.1(3) 1_455 . ? 
C22 C23 C24 115.0(4) . . ? 
O3 C24 C25 116.0(4) 1_655 . ? 
O3 C24 C23 121.2(5) 1_655 . ? 
C25 C24 C23 122.7(4) . . ? 
C24 C25 C26 121.3(4) . . ? 
C11 C10 C9 121.9(6) . . ? 
C11 C10 O3 117.9(5) . . ? 
C9 C10 O3 120.0(5) . . ? 
C12 C11 C10 120.7(5) . . ? 
C29 C30 O9 167(5) . . ? 
O6 O6' N5 63.0(10) . . ? 
O6 O6' O7' 28.0(9) . . ? 
N5 O6' O7' 40.2(10) . . ? 
O6 O6' Cd1 72.8(13) . . ? 
N5 O6' Cd1 125.7(18) . . ? 
O7' O6' Cd1 86.9(13) . . ? 
O6 O7' N5 57.4(11) . . ? 
O6 O7' O6' 27.9(10) . . ? 
N5 O7' O6' 34.3(8) . . ? 
 
_diffrn_measured_fraction_theta_max    0.974 
_diffrn_reflns_theta_full              27.07 
_diffrn_measured_fraction_theta_full   0.974 
_refine_diff_density_max    0.702 
_refine_diff_density_min   -0.514 
_refine_diff_density_rms    0.071 
